# Supplementary material
Source: Springer Nature journal article supplement (https://www.springermedizin.de/resource/supplementary/12885_2013_4456_MOESM13_ESM.pdf/9466468)

A

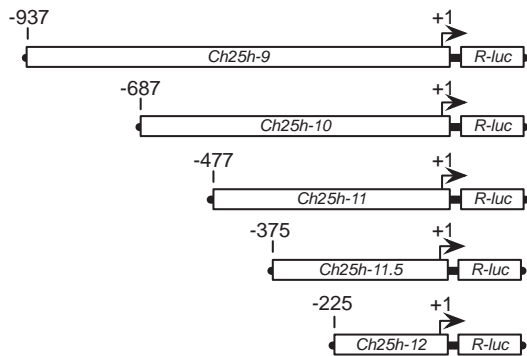

B

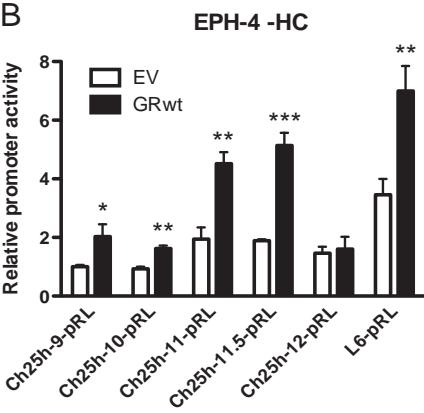

C

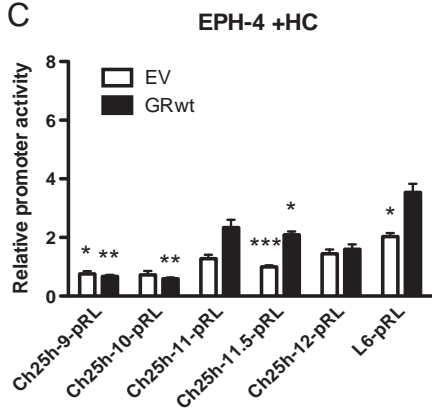

Supplement: MOESM13 [file 9466468]
